Public Health Report

# Cigarette smoking and bladder cancer risk: an evaluation based on a systematic review of epidemiologic evidence in the Japanese population

Hiroyuki Masaoka<sup>1,2</sup>, Keitaro Matsuo<sup>1,3,\*</sup>, Hidemi Ito<sup>3,4</sup>, Kenji Wakai<sup>5</sup>, Chisato Nagata<sup>6</sup>, Tomio Nakayama<sup>7</sup>, Atsuko Sadakane<sup>8</sup>, Keitaro Tanaka<sup>9</sup>, Akiko Tamakoshi<sup>10</sup>, Yumi Sugawara<sup>11</sup>, Tetsuya Mizoue<sup>12</sup>, Norie Sawada<sup>13</sup>, Manami Inoue<sup>13,14</sup>, Shoichiro Tsugane<sup>13</sup>, and Shizuka Sasazuki<sup>13</sup> for the Research Group for the Development and Evaluation of Cancer Prevention Strategies in Japan

<sup>1</sup>Division of Molecular Medicine, Aichi Cancer Center Research Institute, Nagoya, <sup>2</sup>Department of Urology, Graduate School of Medical Sciences, Kyushu University, Fukuoka, <sup>3</sup>Department of Epidemiology, Nagoya University Graduate School of Medicine, Nagoya, <sup>4</sup>Division of Epidemiology and Prevention, Aichi Cancer Center Research Institute, Nagoya, <sup>5</sup>Department of Preventive Medicine, Nagoya University Graduate School of Medicine, Nagoya, <sup>6</sup>Department of Epidemiology and Preventive Medicine, Gifu University Graduate School of Medicine, Gifu, <sup>7</sup>Center for Cancer Control and Statistics, Osaka Medical Center for Cancer and Cardiovascular Diseases, Osaka, <sup>8</sup>Department of Epidemiology, Radiation Effects Research Foundation, Hiroshima, <sup>9</sup>Department of Preventive Medicine, Faculty of Medicine, Saga University, Saga, <sup>10</sup>Department of Public Health, Hokkaido University Graduate School of Medicine, Sapporo, <sup>11</sup>Division of Epidemiology, Department of Public Health and Forensic Medicine, Tohoku University Graduate School of Medicine, Sendai, <sup>12</sup>Department of Epidemiology and International Health, International Clinical Research Center, National Center for Global Health and Medicine, Tokyo, <sup>13</sup>Epidemiology and Prevention Division, Research Center for Cancer Prevention and Screening, National Cancer Center, Tokyo, and <sup>14</sup>AXA Department of Health and Human Security, Graduate School of Medicine, University of Tokyo, Tokyo, Japan

\*For reprints and all correspondence: Keitaro Matsuo, Division of Molecular Medicine, Aichi Cancer Center Research Institute, 1-1 Kanokoden, Chikusa-ku, Nagoya-city, Aichi 464-8681, Japan. E-mail: kmatsuo@aichi-cc.jp

Received 30 August 2015; Accepted 13 November 2015

## Abstract

**Objective:** Although several epidemiological studies have demonstrated that cigarette smoking is an important risk factor for bladder cancer, no systematic review in the Japanese population has yet been performed. Accurate evaluation of bladder cancer risk in relation to smoking for Japanese populations can provide necessary information for Japanese policy-makers and doctors to enlighten the importance of smoking cessation. We reviewed epidemiologic data to estimate the strength of the association between cigarette smoking and bladder cancer in the Japanese population.

**Methods:** We identified previous cohort and case-control studies, extracting data from databases in the MEDLINE (PubMed) and *Ichushi*. The magnitude of association and strength of evidence were evaluated in each study, and a meta-analysis was conducted to obtain summary estimates for the overall magnitude of association.

**Results:** Three cohort and eight case-control studies were identified. Except for one case-control study, all studies showed a strong positive association between cigarette smoking and bladder

cancer. The summary relative risk for ever smokers relative to never smokers was 2.14 (95% confidence interval 1.87–2.44) in a fixed-effect model.

**Conclusions:** We conclude that cigarette smoking is a convincing risk factor for bladder cancer among Japanese.

**Key words:** systematic review, epidemiology, cigarette smoking, bladder cancer, Japanese

## Introduction

The International Agency for Research on Cancer (IARC) clearly identified a causal relationship of smoking with urinary tract cancer both in men and women (1). Several large cohort studies in Europe and the USA have demonstrated that cigarette smoking is an important risk factor for bladder cancer (2,3), and the difference in incidence between sexes is frequently attributed to different historical smoking pattern (4). In Japan, age-adjusted incidence rate of bladder cancer has increased in recent years to ~12.3 per 100 000 people (5), therefore, it is important to take measures for decreasing the risk of bladder cancers.

The incidence rate of bladder cancer varies worldwide, being higher in Europe and North America and lower in Asia (4,6). Further, recent studies have noted that genetic polymorphism differs by race and modulates the risk of bladder cancer for cigarette smoking (7–9). These findings suggest that the impact of smoking on bladder cancer might vary among geographic areas. The recent meta-analysis conducted by Cumberbatch et al. (10) included only three Japanese articles written in English, and no systematic review among the Japanese population has yet appeared. Accurate evaluation of bladder cancer risk associated with smoking only for Japanese populations can provide necessary information for Japanese policy-makers and doctors to enlighten the importance of quitting smoking.

Here, we reviewed epidemiologic data to estimate the strength of the association between cigarette smoking and bladder cancer among Japanese. This report is one of a series of articles by our research group, which is investigating the association between lifestyles and cancers in Japan (11).

## Methods

The details of the evaluation method have been described elsewhere (11). In brief, we identified previous cohort and case-control studies which investigated the association between cigarette smoking and bladder cancer among the Japanese population by extracting studies from the MEDLINE (PubMed) and *Ichushi (Japana Centra Revuo Medicina*, the largest databases of medical papers written in Japanese, URL: jamas.or.jp) databases. This search was complemented by searching the reference literature of identified papers. Our search was conducted on 30 June 2015, and included articles written in Japanese and English. The search terms were as follows: bladder cancer, urinary tract cancer, urothelial cancer, smoking, cigarette, Japan and Japanese (the details are shown in Supplementary data, S1). We reviewed titles and abstracts, and excluded studies performed in populations outside of Japan or lacking information on the association between cigarette smoking and risk of bladder cancer. Accepted articles are summarized in the tables, listed separately as cohort and case-control studies. If multiple reports from a single study were identified, the report with the primary endpoint of incidence or with the largest population was included. A flowchart for research and selection of publications is shown in Supplementary data, S-2.

An evaluation was made based on the magnitude of association and the strength of evidence. The former was assessed by classifying

each study into one of four categories based on relative risk (RR) and statistical significance (SS, statistical significance; NS, not statistical significance) as follows: (1) strong association (symbol  $\uparrow\uparrow$  or  $\downarrow\downarrow$ ),  $RR < 0.5$  or  $RR > 2.0$  (SS); (2) moderate association (symbol  $\uparrow$  or  $\downarrow$ ), either (i)  $RR < 0.5$  or  $RR > 2.0$  (NS), (ii)  $0.5 \leq RR < 0.67$  (SS) or (iii)  $1.5 < RR \leq 2.0$  (SS); (3) weak association (symbol  $\uparrow$  or  $\downarrow$ ), either (i)  $0.5 \leq RR < 0.67$  (NS), (ii)  $1.5 < RR \leq 2.0$  (NS) or (iii)  $0.67 \leq RR \leq 1.5$  (SS); (4) no association (symbol  $-$ ),  $0.67 \leq RR \leq 1.5$  (NS). When multiple RRs were shown in a single study, we primarily adopted the RRs in smoking status categorized as never or ever smokers. If this was not evaluated, we adopted the largest RR for other smoking-related variables (e.g. number of cigarettes per day or pack-years). Table 1 shows summarized criteria for the magnitude of association.

After this process, the strength of evidence was evaluated in a similar manner to that used in the WHO/FAO Expert Consultation Report (12), where evidence was categorized as ‘convincing’, ‘probable’, ‘possible’ or ‘insufficient’ (11). We assumed that biological plausibility corresponded to the judgment of the recent evaluation from the IARC (1). The final judgment is made based on the consensus of research group members. When there was ‘convincing’ or ‘probable’ evidence of an association, we conducted a meta-analysis to obtain summary estimates for the overall magnitude of association.

Meta-analysis was conducted using STATA statistical software version 13.1 (StataCorp LP, College Station, Texas, USA). When RR and its 95% confidence interval (CI) were not provided in articles, we estimated them from  $2 \times 2$  tables. Summary RR and 95% CI were calculated using the STATA command ‘metan’ (13). We assessed heterogeneity between studies using the  $I^2$  statistic and  $P$  value associated with the  $Q$ -statistic (14), and determined the model (random- or fixed-effect model) to consolidate data for meta-analysis. Publication bias was assessed using a funnel plot and Egger’s test (15). Two-sided  $P$  values  $< 0.05$  were considered statistically significant.

## Results

Our search identified five (16–20) cohort and eight (21–28) case-control studies. We excluded two reports (17,18) because of data overlap with other reports (16,19), leaving three (16,19,20) cohort and

**Table 1.** Evaluation of the magnitude of association

| Magnitude of association | Definition               | Statistical significance | Symbol                                       |
|--------------------------|--------------------------|--------------------------|----------------------------------------------|
| Strong                   | $RR < 0.5$ or $RR > 2.0$ | SS                       | $\uparrow\uparrow$ or $\downarrow\downarrow$ |
| Moderate                 | $RR < 0.5$ or $RR > 2.0$ | NS                       | $\uparrow$ or $\downarrow$                   |
|                          | $1.5 < RR \leq 2.0$      | SS                       |                                              |
|                          | $0.5 \leq RR < 0.67$     | SS                       |                                              |
| Weak                     | $1.5 < RR \leq 2.0$      | NS                       | $\uparrow$ or $\downarrow$                   |
|                          | $0.5 \leq RR < 0.67$     | NS                       |                                              |
|                          | $0.67 \leq RR \leq 1.5$  | SS                       |                                              |
| No association           | $0.67 \leq RR \leq 1.5$  | NS                       | -                                            |

RR, relative risk; SS, statistically significant; NS, not statistically significant.

**Table 2.** Cigarette smoking and bladder cancer risk, cohort studies among Japanese populations

| Author<br>(reference no.)     | Study period          | Study population                              | Source of subjects                                                                | Event followed | Number of incident cases or deaths | Category                     | Relative risk (95% CI) | P value for trend | Confounding variables considered | Comments                                                                           |
|-------------------------------|-----------------------|-----------------------------------------------|-----------------------------------------------------------------------------------|----------------|------------------------------------|------------------------------|------------------------|-------------------|----------------------------------|------------------------------------------------------------------------------------|
| Hirayama (16)                 | 1965–81<br>(17 years) | 122 261 men<br>142 857 women<br>≥40 years old | Population-based<br>Kagoshima<br>Okayama<br>Hyogo<br><br>Osaka<br>Aichi<br>Miyagi | Death          | 173 men                            | Smoking status               |                        | Not described     | Adjusted for age                 | Follow-up by death certificate, residential registry, 95% CI converted from 90% CI |
|                               |                       |                                               |                                                                                   |                |                                    | Non-smoker                   | 1.0                    |                   |                                  |                                                                                    |
|                               |                       |                                               |                                                                                   |                |                                    | Daily smoker <sup>a</sup>    | 1.61 (1.03–2.51)       |                   |                                  |                                                                                    |
|                               |                       |                                               |                                                                                   |                |                                    | Number of cigarettes per day |                        |                   |                                  |                                                                                    |
|                               |                       |                                               |                                                                                   |                |                                    | Non-smoker                   | 1.0                    |                   |                                  |                                                                                    |
|                               |                       |                                               |                                                                                   |                |                                    | 1–9                          | 1.07 (0.50–2.27)       |                   |                                  |                                                                                    |
|                               |                       |                                               |                                                                                   |                |                                    | 10–19                        | 1.60 (0.99–2.59)       |                   |                                  |                                                                                    |
|                               |                       |                                               |                                                                                   |                |                                    | ≥20                          | 1.96 (1.22–3.14)       |                   |                                  |                                                                                    |
|                               |                       |                                               |                                                                                   |                |                                    | Age at start of smoking      |                        |                   |                                  |                                                                                    |
|                               |                       |                                               |                                                                                   |                |                                    | Non-smoker                   | 1.0                    |                   |                                  |                                                                                    |
|                               |                       |                                               |                                                                                   |                | 0–19                               | 0.94 (0.42–2.10)             |                        |                   |                                  |                                                                                    |
|                               |                       |                                               |                                                                                   |                | ≥20                                | 1.63 (1.03–2.58)             |                        |                   |                                  |                                                                                    |
|                               |                       |                                               |                                                                                   |                | Years after smoking cessation      |                              |                        |                   |                                  |                                                                                    |
|                               |                       |                                               |                                                                                   |                | Non-smoker                         | 1.0                          |                        |                   |                                  |                                                                                    |
|                               |                       |                                               |                                                                                   |                | 1–4                                | 1.69 (0.49–5.83)             |                        |                   |                                  |                                                                                    |
|                               |                       |                                               |                                                                                   |                | 5–9                                | NA                           |                        |                   |                                  |                                                                                    |
|                               |                       |                                               |                                                                                   |                | ≥10                                | 1.83 (0.46–7.23)             |                        |                   |                                  |                                                                                    |
|                               |                       |                                               |                                                                                   |                | 75 women                           | Smoking status               |                        | P = 0.002         | Adjusted for age and sex         | Including 12 renal pelvis and 7 ureter cancers                                     |
|                               |                       |                                               |                                                                                   |                |                                    | Non-smoker                   | 1.0                    |                   |                                  |                                                                                    |
|                               |                       |                                               |                                                                                   |                |                                    | Daily smoker <sup>a</sup>    | 2.29 (1.33–3.95)       |                   |                                  |                                                                                    |
| Number of cigarettes per day  |                       |                                               |                                                                                   |                |                                    |                              |                        |                   |                                  |                                                                                    |
| Non-smoker                    | 1.0                   |                                               |                                                                                   |                |                                    |                              |                        |                   |                                  |                                                                                    |
| 1–9                           | 1.70 (0.70–4.12)      |                                               |                                                                                   |                |                                    |                              |                        |                   |                                  |                                                                                    |
| 10–19                         | 2.28 (0.99–5.28)      |                                               |                                                                                   |                |                                    |                              |                        |                   |                                  |                                                                                    |
| ≥20                           | 1.79 (0.24–13.50)     |                                               |                                                                                   |                |                                    |                              |                        |                   |                                  |                                                                                    |
| Age at start of smoking       |                       |                                               |                                                                                   |                |                                    |                              |                        |                   |                                  |                                                                                    |
| Non-smoker                    | 1.0                   |                                               |                                                                                   |                |                                    |                              |                        |                   |                                  |                                                                                    |
| 0–19                          | 5.26 (0.91–30.46)     |                                               |                                                                                   |                |                                    |                              |                        |                   |                                  |                                                                                    |
| ≥20                           | 1.87 (0.95–3.69)      |                                               |                                                                                   |                |                                    |                              |                        |                   |                                  |                                                                                    |
| Years after smoking cessation |                       |                                               |                                                                                   |                |                                    |                              |                        |                   |                                  |                                                                                    |
| Non-smoker                    | 1.0                   |                                               |                                                                                   |                |                                    |                              |                        |                   |                                  |                                                                                    |
| 1–4                           | NA                    |                                               |                                                                                   |                |                                    |                              |                        |                   |                                  |                                                                                    |
| 5–9                           | 7.95 (0.65–97.03)     |                                               |                                                                                   |                |                                    |                              |                        |                   |                                  |                                                                                    |
| ≥10                           | NA                    |                                               |                                                                                   |                |                                    |                              |                        |                   |                                  |                                                                                    |
| Sakauchi et al. (19)          | 1988–97<br>(10 years) | 26 464 men<br>38 720 women<br>40–79 years old | Population-based<br>24 Areas in Japan<br>JACC study                               | Incidence      | 95 men<br>28 women                 | Smoking index                |                        | P = 0.002         | Adjusted for age and sex         | Including 12 renal pelvis and 7 ureter cancers                                     |
|                               |                       |                                               |                                                                                   |                |                                    | Non-smoker                   | 1.0                    |                   |                                  |                                                                                    |
|                               |                       |                                               |                                                                                   |                |                                    | <799                         | 2.16 (1.21–3.86)       |                   |                                  |                                                                                    |
|                               |                       |                                               |                                                                                   |                |                                    | ≥800 <sup>a</sup>            | 2.75 (1.49–5.08)       |                   |                                  |                                                                                    |

Continued

**Table 2.** Continued

| Author<br>(reference no.)        | Study period            | Study population<br>Number of subjects for<br>analysis, sex, age | Source of subjects             | Event<br>followed | Number of incident<br>cases or deaths | Category                         | Relative risk (95% CI) | P value for trend | Confounding variables<br>considered | Comments |
|----------------------------------|-------------------------|------------------------------------------------------------------|--------------------------------|-------------------|---------------------------------------|----------------------------------|------------------------|-------------------|-------------------------------------|----------|
| Kurahashi et al.<br>(20)         | 1990–2005 (16<br>years) | 49 566 men<br>54 874 women<br>40–69 years old                    | Population-based<br>JPHC study | Incidence         | 164 men                               | Smoking status                   |                        | <i>P</i> = 0.01   | Adjusted for age and<br>area        |          |
|                                  |                         |                                                                  |                                |                   |                                       | Never                            | 1.0                    |                   |                                     |          |
|                                  |                         |                                                                  |                                |                   |                                       | Former                           | 1.32 (0.80–2.16)       |                   |                                     |          |
|                                  |                         |                                                                  |                                |                   |                                       | Current <sup>a</sup>             | 1.69 (1.09–2.63)       |                   |                                     |          |
|                                  |                         |                                                                  |                                |                   |                                       | Pack-years in<br>current smokers |                        | <i>P</i> < 0.01   |                                     |          |
|                                  |                         |                                                                  |                                |                   |                                       | <20                              | 1.14 (0.53–2.44)       |                   |                                     |          |
|                                  |                         |                                                                  |                                |                   |                                       | 20–29                            | 1.39 (0.74–2.61)       |                   |                                     |          |
|                                  |                         |                                                                  |                                |                   | 30–39                                 | 1.39 (0.77–2.50)                 |                        |                   |                                     |          |
|                                  |                         |                                                                  |                                |                   | 40–49                                 | 2.24 (1.26–3.99)                 |                        |                   |                                     |          |
|                                  |                         |                                                                  |                                |                   | ≥50                                   | 2.61 (1.49–4.56)                 |                        |                   |                                     |          |
|                                  |                         |                                                                  |                                |                   | Years after smoking<br>cessation      |                                  | Not described          |                   |                                     |          |
|                                  |                         |                                                                  |                                |                   | Never                                 | 1.0                              |                        |                   |                                     |          |
|                                  |                         |                                                                  |                                |                   | <10                                   | 1.88 (1.10–3.21)                 |                        |                   |                                     |          |
|                                  |                         |                                                                  |                                |                   | 10–19                                 | 0.71 (0.31–1.63)                 |                        |                   |                                     |          |
| ≥20                              | 0.98 (0.40–2.40)        |                                                                  |                                |                   |                                       |                                  |                        |                   |                                     |          |
| 42 women                         | Smoking status          |                                                                  | Not described                  |                   |                                       |                                  |                        |                   |                                     |          |
| Never                            | 1.0                     |                                                                  |                                |                   |                                       |                                  |                        |                   |                                     |          |
| Former                           | -                       |                                                                  |                                |                   |                                       |                                  |                        |                   |                                     |          |
| Current <sup>a</sup>             | 5.45 (2.56–11.61)       |                                                                  |                                |                   |                                       |                                  |                        |                   |                                     |          |
| Pack-years in<br>current smokers |                         | <i>P</i> < 0.01                                                  |                                |                   |                                       |                                  |                        |                   |                                     |          |
| <25                              | 6.91 (3.00–15.93)       |                                                                  |                                |                   |                                       |                                  |                        |                   |                                     |          |
| ≥25                              | 4.06 (0.96–17.17)       |                                                                  |                                |                   |                                       |                                  |                        |                   |                                     |          |

CI, confidence interval; NA, not available.

<sup>a</sup>Categories from which the magnitude of association was judged.

**Table 3.** Cigarette smoking and bladder cancer risk, case-control studies among Japanese populations

| Author (Reference) | Study period      | Study subjects                                                                                           |                                                                                                                                                                                 |                                                  | Category                                         | Relative risk (95% CI)          | P value for trend | Confounding variables considered                           | Comments                                                                                                                                                                   |                    |      |
|--------------------|-------------------|----------------------------------------------------------------------------------------------------------|---------------------------------------------------------------------------------------------------------------------------------------------------------------------------------|--------------------------------------------------|--------------------------------------------------|---------------------------------|-------------------|------------------------------------------------------------|----------------------------------------------------------------------------------------------------------------------------------------------------------------------------|--------------------|------|
|                    |                   | Type and source                                                                                          | Definition                                                                                                                                                                      | Number of cases                                  |                                                  |                                 |                   |                                                            |                                                                                                                                                                            | Number of controls |      |
| Ohno et al. (21)   | 1976–78           | Population-based (Nagoya Bladder Tumor Registry, 19 hospitals and responsible urologists in Nagoya area) | Cases: those diagnosed with lower urinary tract cancer<br><br>Controls: those selected from electoral registers in the same area                                                | 293 (227 males and 66 females) (20–89 years old) | 589 (443 male and 146 female) (20–89 years old)  | Smoking status                  | Not described     | Matched for age, sex and residence<br><br>Adjusted for age | Including renal pelvis and ureter cancers (details not provided)                                                                                                           |                    |      |
|                    |                   |                                                                                                          |                                                                                                                                                                                 |                                                  |                                                  | Male                            |                   |                                                            |                                                                                                                                                                            |                    |      |
|                    |                   |                                                                                                          |                                                                                                                                                                                 |                                                  |                                                  | Non-smoker                      |                   |                                                            |                                                                                                                                                                            | 1.0                |      |
|                    |                   |                                                                                                          |                                                                                                                                                                                 |                                                  |                                                  | Smoker <sup>a</sup>             |                   |                                                            |                                                                                                                                                                            | 1.89 (1.15–3.10)   |      |
| Female             | Non-smoker        | 1.0                                                                                                      | Smoker <sup>a</sup>                                                                                                                                                             | 3.53 (1.71–7.27)                                 |                                                  |                                 |                   |                                                            |                                                                                                                                                                            |                    |      |
| Nishio et al. (22) | 1975–87           | Hospital-based (Kyoto University Hospital)                                                               | Cases: patients admitted to the hospital for the treatment of bladder cancer<br><br>Controls: patients admitted to the hospital for the treatment of benign urological diseases | 278 (200 males and 78 females) (31–86 years old) | 278 (200 males and 78 females) (31–86 years old) | Smoking status                  | Not described     | Matched for age and sex                                    | Ex-smoker: quit smoking > 5 years<br>Smoker: current or quit smoking ≤ 5 years<br><br>Tobacco index was defined as number of cigarettes per day multiplied by years smoked |                    |      |
|                    |                   |                                                                                                          |                                                                                                                                                                                 |                                                  |                                                  | Male                            |                   |                                                            |                                                                                                                                                                            |                    |      |
|                    |                   |                                                                                                          |                                                                                                                                                                                 |                                                  |                                                  | Never                           |                   |                                                            |                                                                                                                                                                            | 1.0                |      |
|                    |                   |                                                                                                          |                                                                                                                                                                                 |                                                  |                                                  | Ex-smoker                       |                   |                                                            |                                                                                                                                                                            | 1.56 (0.98–2.47)   |      |
|                    |                   |                                                                                                          |                                                                                                                                                                                 |                                                  |                                                  | Smoker                          |                   |                                                            |                                                                                                                                                                            | 1.45 (0.97–2.16)   |      |
|                    |                   |                                                                                                          |                                                                                                                                                                                 |                                                  |                                                  | Smoker + Ex-smoker <sup>a</sup> |                   |                                                            |                                                                                                                                                                            | 3.33 (1.94–5.70)   |      |
|                    |                   |                                                                                                          |                                                                                                                                                                                 |                                                  |                                                  | Female                          |                   |                                                            |                                                                                                                                                                            | Never              | 1.0  |
|                    |                   |                                                                                                          |                                                                                                                                                                                 |                                                  |                                                  | Ex-smoker                       |                   |                                                            |                                                                                                                                                                            | 0.66 (0.11–4.03)   |      |
|                    |                   |                                                                                                          |                                                                                                                                                                                 |                                                  |                                                  | Smoker <sup>a</sup>             |                   |                                                            |                                                                                                                                                                            | 4.36 (1.73–10.96)  |      |
|                    |                   |                                                                                                          |                                                                                                                                                                                 |                                                  |                                                  | Smoker + Ex-smoker              |                   |                                                            |                                                                                                                                                                            | 3.21 (1.41–7.32)   |      |
|                    |                   |                                                                                                          |                                                                                                                                                                                 |                                                  |                                                  | Smoking (Tobacco index)         |                   |                                                            |                                                                                                                                                                            | Male               | <500 |
| Female             | <300              | 1.0                                                                                                      |                                                                                                                                                                                 |                                                  |                                                  |                                 |                   |                                                            |                                                                                                                                                                            |                    |      |
| >=500              | 2.03 (1.36–3.04)  |                                                                                                          |                                                                                                                                                                                 |                                                  |                                                  |                                 |                   |                                                            |                                                                                                                                                                            |                    |      |
| >=300              | 4.38 (1.63–11.78) |                                                                                                          |                                                                                                                                                                                 |                                                  |                                                  |                                 |                   |                                                            |                                                                                                                                                                            |                    |      |

*Continued*

Table 3. Continued

| Author (Reference)      | Study period     | Study subjects                                               |                                                                                  |                                                   |                                                     | Category                     | Relative risk (95% CI) | P value for trend | Confounding variables considered | Comments                                    |
|-------------------------|------------------|--------------------------------------------------------------|----------------------------------------------------------------------------------|---------------------------------------------------|-----------------------------------------------------|------------------------------|------------------------|-------------------|----------------------------------|---------------------------------------------|
|                         |                  | Type and source                                              | Definition                                                                       | Number of cases                                   | Number of controls                                  |                              |                        |                   |                                  |                                             |
| Tachiki et al. (23)     | 1980–89          | Hospital-based (five hospitals in Muroan area)               | Cases: outpatients diagnosed with bladder cancer, residing in Muroan area        | 67 (56 males and 11 females) (age: not described) | 306 (238 males and 68 females) (age: not described) | Smoking status               |                        |                   | Not adjusted                     | OR and 95% CI were estimated from 2x2 table |
|                         |                  |                                                              |                                                                                  |                                                   |                                                     | Male                         |                        | $P < 0.01$        |                                  |                                             |
|                         |                  |                                                              |                                                                                  |                                                   |                                                     | Never                        | 1.0                    |                   |                                  |                                             |
|                         |                  |                                                              |                                                                                  |                                                   |                                                     | Ever <sup>a</sup>            | 4.70 (1.41–15.67)      | $P = 0.45$        |                                  |                                             |
|                         |                  |                                                              |                                                                                  |                                                   |                                                     | Female                       |                        |                   |                                  |                                             |
| Nakata et al. (24)      | 1987–92          | Population-based (Selected municipality in Gunma Prefecture) | Cases: untreated men diagnosed with bladder cancer, residing in Gunma Prefecture | 303 males (40 years or older, age mean: 70.1)     | 303 males (40 years or older, age mean: 70.2)       | Smoking status               |                        |                   | Matched for age ( $\pm 1$ year)  |                                             |
|                         |                  |                                                              |                                                                                  |                                                   |                                                     | Never                        | 1.0                    | Not described     |                                  |                                             |
|                         |                  |                                                              |                                                                                  |                                                   |                                                     | Ever <sup>a</sup>            | 2.40 (1.42–4.04)       |                   |                                  |                                             |
|                         |                  |                                                              |                                                                                  |                                                   |                                                     |                              |                        | $P < 0.01$        |                                  |                                             |
|                         |                  |                                                              |                                                                                  |                                                   |                                                     | Number of cigarettes per day |                        |                   |                                  |                                             |
|                         |                  |                                                              |                                                                                  |                                                   |                                                     | Never                        | 1.0                    |                   |                                  |                                             |
|                         |                  |                                                              |                                                                                  |                                                   |                                                     | $\leq 10$                    | 1.28 (0.68–2.42)       |                   |                                  |                                             |
|                         |                  |                                                              |                                                                                  |                                                   |                                                     | 11–20                        | 2.87 (1.66–4.96)       |                   |                                  |                                             |
|                         |                  |                                                              |                                                                                  |                                                   |                                                     | $\geq 21$                    | 2.78 (1.46–5.29)       |                   |                                  |                                             |
|                         |                  |                                                              |                                                                                  |                                                   |                                                     | Years of smoking             |                        | $P < 0.01$        |                                  |                                             |
|                         |                  |                                                              |                                                                                  |                                                   |                                                     | Never                        | 1.0                    |                   |                                  |                                             |
|                         |                  |                                                              |                                                                                  |                                                   |                                                     | $\leq 29$                    | 1.55 (0.80–3.01)       |                   |                                  |                                             |
|                         |                  |                                                              |                                                                                  |                                                   |                                                     | 30–49                        | 2.33 (1.29–4.21)       |                   |                                  |                                             |
|                         |                  |                                                              |                                                                                  |                                                   |                                                     | $\geq 50$                    | 2.56 (1.34–4.92)       |                   |                                  |                                             |
|                         |                  |                                                              |                                                                                  |                                                   |                                                     | Smoking (Brinkman index)     |                        | $P < 0.01$        |                                  |                                             |
| Never                   | 1.0              |                                                              |                                                                                  |                                                   |                                                     |                              |                        |                   |                                  |                                             |
| $\leq 499$              | 1.20 (0.63–2.27) |                                                              |                                                                                  |                                                   |                                                     |                              |                        |                   |                                  |                                             |
| 500–999                 | 2.89 (1.61–5.19) |                                                              |                                                                                  |                                                   |                                                     |                              |                        |                   |                                  |                                             |
| $\geq 1000$             | 3.09 (1.64–5.83) |                                                              |                                                                                  |                                                   |                                                     |                              |                        |                   |                                  |                                             |
| Age at start of smoking |                  | $P < 0.01$                                                   |                                                                                  |                                                   |                                                     |                              |                        |                   |                                  |                                             |
| Never                   | 1.0              |                                                              |                                                                                  |                                                   |                                                     |                              |                        |                   |                                  |                                             |
| $\leq 19$               | 2.57 (1.36–4.87) |                                                              |                                                                                  |                                                   |                                                     |                              |                        |                   |                                  |                                             |
| 20–24                   | 2.84 (1.65–4.90) |                                                              |                                                                                  |                                                   |                                                     |                              |                        |                   |                                  |                                             |
| $\geq 25$               | 1.25 (0.65–2.38) |                                                              |                                                                                  |                                                   |                                                     |                              |                        |                   |                                  |                                             |
| Inhalation style        |                  | $P < 0.01$                                                   |                                                                                  |                                                   |                                                     |                              |                        |                   |                                  |                                             |
| Never                   | 1.0              |                                                              |                                                                                  |                                                   |                                                     |                              |                        |                   |                                  |                                             |
| No inhalation           | 1.12 (0.57–2.18) |                                                              |                                                                                  |                                                   |                                                     |                              |                        |                   |                                  |                                             |
| Moderate                | 2.81 (1.64–4.84) |                                                              |                                                                                  |                                                   |                                                     |                              |                        |                   |                                  |                                             |
| Deep                    | 2.91 (1.51–5.63) |                                                              |                                                                                  |                                                   |                                                     |                              |                        |                   |                                  |                                             |

Details of inhalation style not provided

|                    |           |                                                                            |                                                                                                                                                                                                              |                                                                                           |                                                                                          |                                                                                     |                                                                                             |               |                                                                      |                                                                                                                      |
|--------------------|-----------|----------------------------------------------------------------------------|--------------------------------------------------------------------------------------------------------------------------------------------------------------------------------------------------------------|-------------------------------------------------------------------------------------------|------------------------------------------------------------------------------------------|-------------------------------------------------------------------------------------|---------------------------------------------------------------------------------------------|---------------|----------------------------------------------------------------------|----------------------------------------------------------------------------------------------------------------------|
| Murata et al. (25) | 1984–93   | Hospital-based (Chiba Cancer Association)<br><br>nested case-control study | Cases: those diagnosed with bladder cancer in the cohort (participants of a gastric mass screening), identified by Chiba Cancer Registry<br><br>Controls: those with no cancer selected from the same cohort | 38 males (age: not described)                                                             | 76 males (age: not described)                                                            | Number of cigarettes per day<br>Non-smoker<br>1–10 <sup>a</sup><br><br>11–20<br>≥21 | 1.0<br>2.57 (0.74–8.95)<br><br>2.25 (0.91–5.55)<br>1.29 (0.29–5.66)                         | Not described | Matched for birth year (±2 year) and first digit of the address cord | 95% CI was estimated from 2 × 2 table<br>smoker: quit smoking <2 years<br>Non-smoker: never or quit smoking ≥2 years |
| Wada et al. (26)   | 1994–99   | Hospital-based (Osaka City University Hospital)                            | Cases: those admitted to the hospital for the treatment of bladder cancer<br><br>Controls: those admitted to the hospital for the treatment of benign urological diseases                                    | 141 (117 males and 24 females) (45–85 years old) (age mean: 66.4 in male, 64.5 in female) | 128 (99 males and 29 females) (46–82 years old) (age mean: 68.0 in male, 61.7 in female) | Smoking status<br>Non-smoker<br>Smoker <sup>a</sup>                                 | 1.0<br>2.07 (1.23–3.49)                                                                     | Not described | Not adjusted                                                         | Smoker: ≥10 cigarettes per day for ≥1 year                                                                           |
| Wakai et al. (27)  | 1994–2000 | Hospital-based (Aichi Cancer Center Hospital)                              | Cases: outpatients first diagnosed with bladder cancer<br><br>Controls: outpatients with no history of cancer                                                                                                | 124 (100 males and 24 females) (mean age: 61.9)                                           | 620 (500 males and 120 females) (mean age: 61.9)                                         | Smoking (pack-years)<br>0<br><br>1–19<br>20–39<br><br>40–59 <sup>a</sup><br>≥60     | 1.0<br><br>1.30 (0.65–2.59)<br>1.58 (0.82–3.05)<br><br>2.90 (1.55–5.42)<br>2.41 (1.21–4.78) | P = 0.0009    | Adjusted for age, sex and year of first visit                        | including 5 renal pelvis and 6 ureter cancers                                                                        |
| Nobata et al. (28) | 2008–11   | Hospital-based (Seirei Yobo Kennshin Center; medical health check-up)      | Cases: those who had a history of bladder cancer when receiving medical health check-up<br><br>Controls: those who had no history of bladder cancer when receiving medical health check-up                   | 52 (42 males and 10 females) (36–77 years old)                                            | 30,337 (17,938 males and 12,399 females) (age: not described)                            | Smoking status<br>Non-smoker<br>Smoker <sup>a</sup>                                 | 1.0<br>2.04 (1.15–3.61)                                                                     | P = 0.0126    | Not adjusted                                                         | OR and 95% CI were estimated from 2 × 2 table                                                                        |

<sup>a</sup>Categories from which the magnitude of association was judged.

**Table 4.** Summary of association between cigarette smoking and bladder cancer risk, cohort studies

| Author           | Study period | Study subjects |                    |                   |           |                                    | Category                    | Magnitude of association |
|------------------|--------------|----------------|--------------------|-------------------|-----------|------------------------------------|-----------------------------|--------------------------|
|                  |              | Sex            | Number of subjects | Age range (years) | Event     | Number of incident cases or deaths |                             |                          |
| Hirayama         | 1965–81      | Male           | 122 261            | ≥40               | Death     | 173                                | Smoking status <sup>a</sup> | ↑↑                       |
|                  |              | Female         | 142 857            | ≥40               | Death     | 75                                 | Smoking status <sup>a</sup> | ↑↑↑                      |
| Sakauchi et al.  | 1988–97      | Male           | 26 464             | 40–79             | Incidence | 95                                 | Smoking index <sup>b</sup>  | ↑↑↑                      |
|                  |              | Female         | 38 720             | 40–79             | Incidence | 28                                 |                             |                          |
| Kurahashi et al. | 1990–2005    | Male           | 49 566             | 40–69             | Incidence | 164                                | Smoking status <sup>a</sup> | ↑↑                       |
|                  |              | Female         | 54 874             | 40–69             | Incidence | 42                                 | Smoking status <sup>a</sup> | ↑↑↑                      |

↑↑↑, Strong positive association; ↑↑, moderate positive association.

<sup>a</sup>Categorized as never or ever smokers.

<sup>b</sup>Categorized as number of cigarettes per day multiplied by years smoked.

**Table 5.** Summary of association between cigarette smoking and bladder cancer risk, case-control studies

| Author         | Study period | Study subjects  |                   |                     |                            | Category                     | Magnitude of association |
|----------------|--------------|-----------------|-------------------|---------------------|----------------------------|------------------------------|--------------------------|
|                |              | Sex             | Age range (years) | Number of cases     | Number of controls         |                              |                          |
| Ohno et al.    | 1976–78      | Male            | 20–89             | 227                 | 443                        | Smoking status <sup>a</sup>  | ↑↑                       |
|                |              | Female          | 20–89             | 66                  | 146                        | Smoking status <sup>a</sup>  | ↑↑↑                      |
| Nishio et al.  | 1975–87      | Male            | 35–84             | 200                 | 200                        | Smoking status <sup>a</sup>  | ↑↑↑                      |
|                |              | Female          | 31–86             | 78                  | 78                         | Smoking status <sup>a</sup>  | ↑↑↑                      |
| Tachiki et al. | 1980–89      | Male            | Not described     | 56                  | 238                        | Smoking status <sup>a</sup>  | ↑↑↑                      |
|                |              | Female          | Not described     | 11                  | 68                         | Smoking status <sup>a</sup>  | ↑                        |
| Nakata et al.  | 1987–92      | Male            | ≥40               | 303                 | 303                        | Smoking status <sup>a</sup>  | ↑↑↑                      |
| Murata et al.  | 1984–93      | Male            | Not described     | 38                  | 76                         | Number of cigarettes per day | ↑↑                       |
| Wada et al.    | 1994–99      | Male and female | 45–85             | 141 (M: 117, F: 24) | 128 (M: 99, F: 29)         | Smoking status <sup>a</sup>  | ↑↑↑                      |
| Wakai et al.   | 1994–2000    | Male and female | 20–79             | 124 (M: 100, F: 24) | 620 (M: 500, F: 120)       | Pack-years                   | ↑↑↑                      |
| Nobata et al.  | 2008–11      | Male and female | 36–77             | 52 (M: 42, F: 10)   | 30337 (M: 17938, F: 12399) | Smoking status <sup>a</sup>  | ↑↑↑                      |

↑↑↑, Strong positive association; ↑↑, moderate positive association; ↑, weak positive association; M, male; F, female.

<sup>a</sup>Categorized as never or ever smokers.

eight (21–28) case-control studies (Tables 2 and 3). Of these cohort studies, two (16,20) presented the results by sex and one (19) for men and women combined. Among case-control studies, three (21–23) presented the results by sex, three (26–28) for men and women combined and two (24,25) for men only. One cohort (19) and two case-control (21,27) studies included renal pelvis and ureter cancer in cases—we kept these studies because only 12% of total patients had renal pelvis or ureter cancers, and RRs of these studies were similar to those of the other studies.

A summary of the magnitude of association for the cohort and case-control studies is shown in Tables 4 and 5, respectively. All cohort studies and seven of eight case-control studies showed a strong positive association between cigarette smoking and bladder cancer, while the remaining study (25) showed a moderate positive association. A dose-response relationship was indicated in all cohort studies (16,19,20) and in three case-control studies (22,24,27), but not one (25).

Meta-analysis was conducted to evaluate the magnitude of cigarette smoking among the Japanese population (Fig. 1). Because heterogeneity testing with the  $I^2$  statistic and  $Q$ -statistic was not significant ( $I^2 = 0.0$ ,  $X^2 = 7.23$ ,  $P = 0.704$ ), a fixed-effect model was selected to calculate summary RR and 95% CI. The summary RRs for ever smokers relative to never smokers in the cohort and case-control studies

were 1.93 (95% CI 1.58–2.36) and 2.30 (95% CI 1.94–2.73), respectively, and the summary RR for all studies combined was 2.14 (95% CI 1.87–2.44). Although Egger's test showed no significant publication bias ( $P = 0.095$ ), visual inspection of the funnel plot could not completely rule out the possibility of this bias (Fig. 2).

## Discussion

The present study indicates a high risk of bladder cancer for ever smokers and a reasonably consistent dose-response relationship between cigarette smoking and bladder cancer. The findings can make Japanese medical doctors aware of the importance of antismoking education for preventing incidence of bladder cancer.

A recent meta-analysis reported a summary RR for bladder cancer incidence among ever smokers compared with never smokers (10). The summary RR for the total world was 2.46 (95% CI 2.16–2.81), and 2.98 (95% CI 2.67–3.36), 2.36 (95% CI 2.10–2.65) and 2.26 (95% CI 1.79–2.86) for Europe, America and Asia, respectively. Although RR among the Asian population was lower, a significant difference by geographic region was not shown ( $P = 0.08$ ). The summary RR of the present study was 2.14, similar to that of Asia in the meta-analysis, and apparently somewhat lower than in Europe and America.



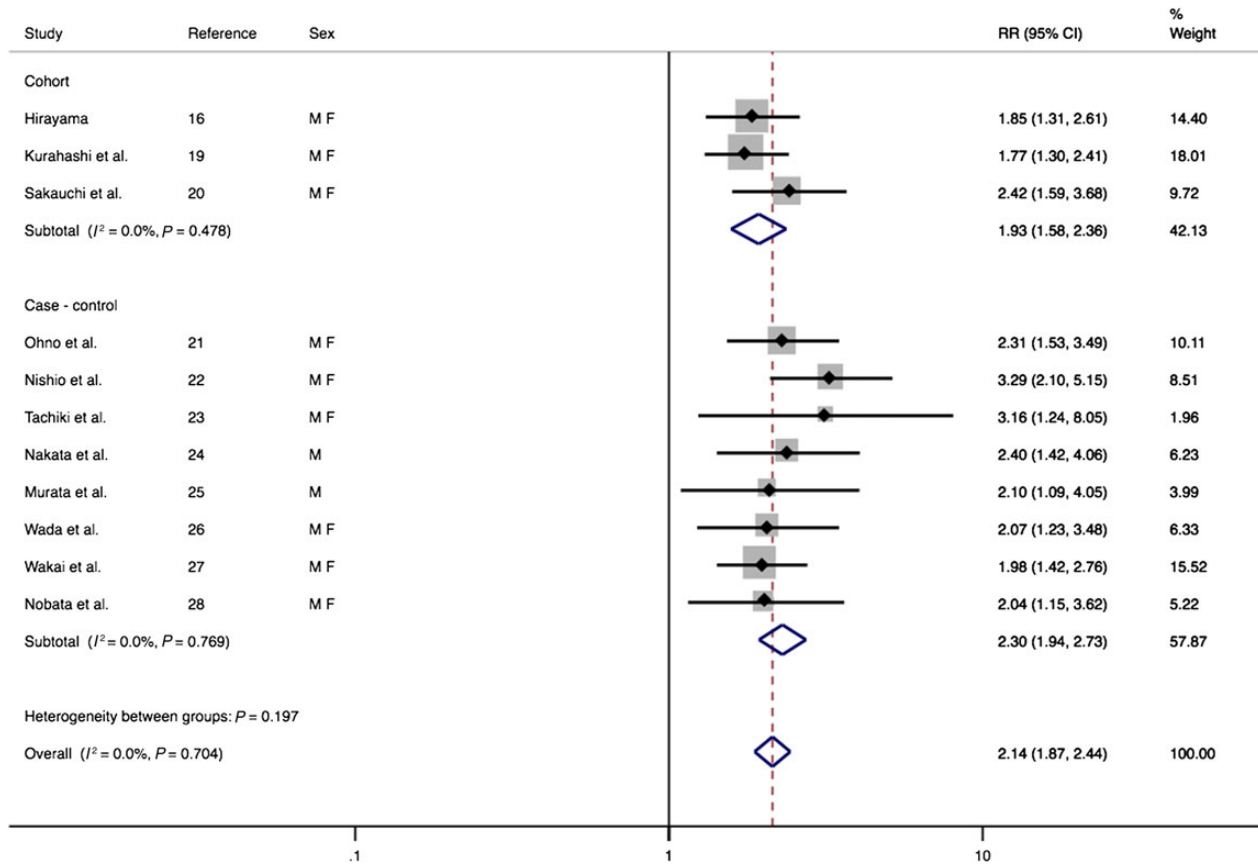

Figure 1. Forest plot of summary relative risk with 95% confidence interval for bladder cancer among ever smokers compared with never smokers.

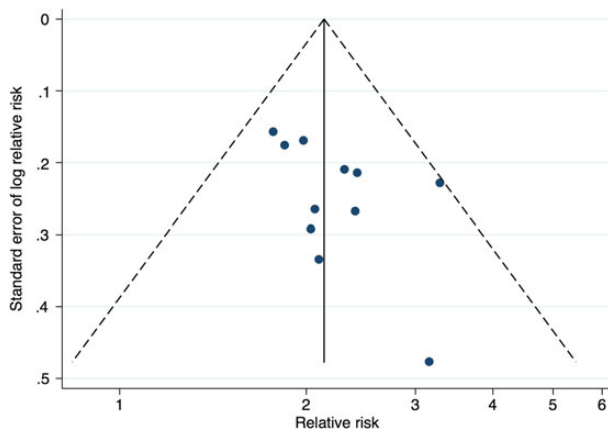

Figure 2. Funnel plot with 95% confidence limits.

The lower RR in Japan might be explained as follows. Smoking exposure for smokers may be lower in Japan than in Europe and America. Studies of the association between cigarette smoking and lung cancer indicated that age at the initiation of smoking was relatively later and the number of cigarettes per day was 10% lower among Japanese than Americans (29). Some data also suggested that the shift from non-filter to filter cigarettes in the 1950s and 1960s occurred more rapidly in Japan than in America (30), and that the use of filter cigarettes was associated with about a half reduced risk compared with non-filter cigarettes (31,32). These differences in smoking style

and cigarette type might modify the effect of smoking on bladder cancer. The lower risk in Japanese smokers might also be explained by genetic variations. N-acetyltransferase 2 (NAT2) is considered an important enzyme for the detoxification of carcinogens (33). Among previous studies, a meta-analysis suggested that the NAT2 slow acetylator genotype might be a risk factor for bladder cancer (8), and significantly increased the risk of bladder cancer for smokers among Japanese (7,9). Prevalence of the slow acetylator genotype differs, at 56% in Europeans versus 11% in Asians (8). The lower incidence rate of bladder cancer in Japan might be due to the lower prevalence of this genetic polymorphism.

This study has several potential limitations. First, we were unable to estimate the summary RR for current smokers relative to never smokers because all but two studies (20,22) reported bladder cancer risk for ever smokers only. If we estimated RR for current smokers relative to never smokers based on the two studies, we observed consistently increased RR (2.79 (95% CI 2.06–3.80)). Second, one study (16) included in this meta-analysis used death as outcome measure. However, its RR and 95% CI were similar to the other studies using incidence. Third, smokers were classified differently; for example, one study classified short-term smokers (less than 1 year) in the non-smoker group, and another included former smokers with a short duration of smoking cessation in the smoker group. These differences might have attenuated the association between cigarette smoking and bladder cancer. Fourth, each questionnaire categorized smoking exposure differently (e.g. smoking status, number of cigarettes, smoking index). However, heterogeneity among articles was not high, and the magnitude of the effects of these problems might have had only a small influence on our findings.

Another methodological problem was that some studies (19,21,27) included cases with upper urinary tract cancer (i.e. renal pelvis and ureter cancer). When we limited analysis to these three articles only, the summary RR for ever smokers was 2.19 (95% CI 1.75–2.73), similar to that of all articles. This may be because the proportion of patients with upper urinary tract cancer was considerably low, and cigarette smoking confers almost the same risk for upper urinary tract cancer as bladder cancer (34). Resolving these limitations will likely require a pooled analysis of Japanese cohort studies.

### Evaluation of evidence on cigarette smoking and bladder cancer risk in Japanese

From these results and on the basis of assumed biological plausibility, we conclude that cigarette smoking is a convincing risk factor for bladder cancer among Japanese population. However, the strength of association might be somewhat weaker than that in Europe and America.

### Supplementary data

Supplementary data at <http://www.jjco.oxfordjournals.org>.

### Acknowledgements

The authors gratefully acknowledge the assistance of Ms Izumi Suenaga.

### Funding

This study was supported by the National Cancer Center Research and Development Fund.

### Conflict of interest statement

None declared.

### References

- International Agency for Research on Cancer. *IARC Monographs on the Evaluation of Carcinogenic Risks to Humans*. Personal Habits and Indoor Combustions, Vol. 100E. Lyon, France: IARC 2012.
- Bjerregaard BK, Raaschou-Nielsen O, Sorensen M, et al. Tobacco smoke and bladder cancer—in the European Prospective Investigation into Cancer and Nutrition. *Int J Cancer* 2006;119:2412–6.
- Freedman ND, Silverman DT, Hollenbeck AR, Schatzkin A, Abnet CC. Association between smoking and risk of bladder cancer among men and women. *JAMA* 2011;306:737–45.
- Burger M, Catto JW, Dalbagni G, et al. Epidemiology and risk factors of urothelial bladder cancer. *Eur Urol* 2013;63:234–41.
- Matsuda A, Matsuda T, Shibata A, Katanoda K, Sobue T, Nishimoto H. Cancer incidence and incidence rates in Japan in 2008: a study of 25 population-based cancer registries for the Monitoring of Cancer Incidence in Japan (MCIJ) project. *Jpn J Clin Oncol* 2014;44:388–96.
- Ferlay J, Soerjomataram I, Ervik M, et al. *GLOBOCAN 2012 v1.0, Cancer Incidence and Mortality Worldwide: IARC CancerBase No. 11 [Internet]*. Lyon, France: International Agency for Research on Cancer 2013. <http://globocan.iarc.fr> (21 July 2015, date last accessed).
- Tsukino H, Nakao H, Kuroda Y, et al. Glutathione S-transferase (GST) M1, T1 and N-acetyltransferase 2 (NAT2) polymorphisms and urothelial cancer risk with tobacco smoking. *Eur J Cancer Prev* 2004;13:509–14.
- García-Closas M, Malats N, Silverman D, et al. NAT2 slow acetylation, GSTM1 null genotype, and risk of bladder cancer: results from the Spanish Bladder Cancer Study and meta-analyses. *Lancet* 2005;366:649–59.
- Cui X, Lu X, Hiura M, Omori H, Miyazaki W, Katoh T. Association of genotypes of carcinogen-metabolizing enzymes and smoking status with bladder cancer in a Japanese population. *Environ Health Prev Med* 2013;18:136–42.
- Cumberbatch MG, Rota M, Catto JW, La Vecchia C. The role of tobacco smoke in bladder and kidney carcinogenesis: a comparison of exposures and meta-analysis of incidence and mortality risks. *Eur Urol* Forthcoming 2015. doi:10.1016/j.eururo.2015.06.042. [Epub ahead of print].
- Inoue M, Tsuji I, Wakai K, et al. Evaluation based on systematic review of epidemiological evidence among Japanese populations: tobacco smoking and total cancer risk. *Jpn J Clin Oncol* 2005;35:404–11.
- World Health Organization. WHO Technical Reports Series 916. Diet, Nutrition and Prevention of Chronic Diseases: Report of a Joint WHO/FAO Expert Consultation. Geneva: WHO 2003.
- Harris RJ, Bradburn MJ, Deeks JJ, Harbord RM, Altman DG, Sterne JAC. Metan: fixed- and random-effects meta-analysis. *Stata J* 2008;8:3–28.
- Higgins JP, Thompson SG, Deeks JJ, Altman DG. Measuring inconsistency in meta-analyses. *BMJ* 2003;327:557–60.
- Egger M, Smith GD, Schneider M, Minder C. Bias in meta-analysis detected by a simple, graphical test. *BMJ* 1997;315:629–34.
- Hirayama T. *Life-style and mortality. A large-scale census-based cohort study in Japan*. Basel, Switzerland: Karger 1990.
- Akiba S, Hirayama T. Cigarette smoking and cancer mortality risk in Japanese men and women—results from reanalysis of the six-prefecture cohort study data. *Environ Health Perspect* 1990;87:19–26.
- Sakauchi F, Mori M, Washio M, et al. Dietary habits and risk of urothelial cancer death in a large-scale cohort study (JACC Study) in Japan. *Nutr Cancer* 2004;50:33–9.
- Sakauchi F, Mori M, Washio M, et al. Dietary habits and risk of urothelial cancer incidence in the JACC Study. *J Epidemiol* 2005;15(Supplement\_II):S190–55.
- Kurahashi N, Inoue M, Iwasaki M, Sasazuki S, Tsugane S. Coffee, green tea, and caffeine consumption and subsequent risk of bladder cancer in relation to smoking status: a prospective study in Japan. *Cancer Sci* 2009;100:284–91.
- Ohno Y, Aoki K, Obata K, Morrison AS. Case-control study of urinary bladder cancer in metropolitan Nagoya. *Natl Cancer Inst Monogr* 1985;69:229–34.
- Nishio Y, Miyakawa M, Yoshida O. Occupation and tobacco as risk factors in urinary bladder cancer. *Hinyokika Kyo* 1989;35:2041–8 (in Japanese).
- Tachiki H, Maruta H, Sano M. Epidemiological study on occurrence of bladder tumor in Muroan area. *Shiritsu Muroan Sogobyojin Ishi* 1991;16:60–5 (in Japanese).
- Nakata S, Sato J, Ohtake N, Imai K, Yamanaka H. Epidemiological study of risk factors for bladder cancer. *Hinyokika Kyo* 1995;41:969–77 (in Japanese).
- Murata M, Takayama K, Choi B, Pak A. A nested case-control study on alcohol drinking, tobacco smoking, and cancer. *Cancer Detect Prev* 1996;20:557–65.
- Wada S, Yoshimura R, Masuda C, et al. Are tobacco use and urine pH indicated as risk factors for bladder carcinoma? *Int J Urol* 2001;8:106–9.
- Wakai K, Hirose K, Takezaki T, et al. Foods and beverages in relation to urothelial cancer: case-control study in Japan. *Int J Urol* 2004;11:11–9.
- Nobata S, Kiuchi S, Watanabe M. Association between urological cancers and cigarette smoking in those who get a complete medical checkup. *Nippon Jinhinyokisikkan Yoboigaku Kenkyukaiishi* 2013;21:73–5 (in Japanese).
- Sobue T, Yamamoto S, Hara M, Sasazuki S, Sasaki S, Tsugane S. Cigarette smoking and subsequent risk of lung cancer by histologic type in middle-aged Japanese men and women: the JPHC study. *Int J Cancer* 2002;99:245–51.
- Ito H, Matsuo K, Tanaka H, et al. Nonfilter and filter cigarette consumption and the incidence of lung cancer by histological type in Japan and the United States: Analysis of 30-year data from population-based cancer registries. *Int J Cancer* 2011;128:1918–28.
- Howe GR, Burch JD, Miller AB, et al. Tobacco use, occupation, coffee, various nutrients, and bladder cancer. *J Natl Cancer Inst* 1980;64:701–13.

32. Vineis P, Esteve J, Terracini B. Bladder cancer and smoking in males: types of cigarettes, age at start, effect of stopping and interaction with occupation. *Int J Cancer* 1984;34:165–70.
33. Kakehi Y, Hirao Y, Kim W-J, et al. Bladder cancer working group report. *Jpn J Clin Oncol* 2010;40(suppl 1):i57–64.
34. McLaughlin JK, Silverman DT, Hsing AW, et al. Cigarette smoking and cancers of the renal pelvis and ureter. *Cancer Res* 1992;52:254–7.

## Appendix 1

Research group members: Shizuka Sasazuki [principal investigator], Shoichiro Tsugane, Manami Inoue, Motoki Iwasaki, Tetsuya Otani [until 2006], Norie Sawada [since 2007], Taichi Shimazu

[since 2007], Taiki Yamaji [since 2007] (National Cancer Center, Tokyo); Ichiro Tsuji [since 2004 until 2015], Yoshitaka Tsubono [in 2003] (Tohoku University, Sendai); Yoshikazu Nishino [until 2006] (Miyagi Cancer Research Institute, Natori); Akiko Tamakoshi [since 2010] (Hokkaido University, Sapporo); Keitaro Matsuo [until 2010, since 2012], Hidemi Ito [since 2010 until 2011, since 2015] (Aichi Cancer Center, Nagoya); Kenji Wakai (Nagoya University, Nagoya); Chisato Nagata (Gifu University, Gifu); Tetsuya Mizoue (National Center for Global Health and Medicine, Tokyo); Keitaro Tanaka (Saga University, Saga), Tomio Nakayama [since 2015] (Osaka Medical Center for Cancer and Cardiovascular Diseases, Osaka); Atsuko Sadakane [since 2015] (Radiation Effects Research Foundation, Hiroshima).
